# Supplementary material for: Synthesis of the Src SH2 domain and its application in bioassays for mirror-image screening
Source: Royal Society of Chemistry journal article supplement (doi:10.1039/c7ra07445j), 2017-01-01
Supplement: c7ra07445j1.pdf [file c7ra07445j1.pdf]

*Supplementary Information*

**Synthesis of the Src SH2 domain protein and its application in bioassays  
for mirror-image screening**

Keitou Shu,<sup>a,b</sup> Taro Noguchi,<sup>a</sup> Kaori Honda,<sup>c</sup> Yasumitsu Kondoh,<sup>c</sup> Hiroyuki Osada,<sup>c</sup>  
Hiroaki Ohno,<sup>a</sup> Nobutaka Fujii,<sup>a</sup> and Shinya Oishi<sup>a,\*</sup>

<sup>a</sup> *Graduate School of Pharmaceutical Sciences, Kyoto University,  
Sakyo-ku, Kyoto 606-8501, Japan*

<sup>b</sup> *Graduate School of Advanced Integrated Studies in Human Survivability, Kyoto University,  
Sakyo-ku, Kyoto 606-8306, Japan*

<sup>c</sup> *Chemical Biology Research Group, RIKEN Center for Sustainable Resource Science,  
Wako, Saitama 351-0198, Japan*

**Contents**

|                                                                                |        |
|--------------------------------------------------------------------------------|--------|
| Experimental procedures                                                        | S2-S3  |
| Analytical HPLC chromatograms and mass spectrometry data of synthetic peptides | S4-S20 |

## Experimental procedures

**D-Src(145-187) (D-3a).** By the identical procedure described for the synthesis of peptide **L-3a**, thioester **D-3a** was synthesized (7.8 mg, 2.1% yield) from H-Rink Amide-ChemMatrix resin (40 mg  $\times$  3 portions, 0.048-0.072 mmol). MS(ESI): Calcd for  $C_{231}H_{357}N_{64}O_{71}S$ : 5198.83 (MH<sup>+</sup>); observed: [M+6H]<sup>6+</sup>  $m/z$  = 867.4, [M+5H]<sup>5+</sup>  $m/z$  = 1040.7, [M+4H]<sup>4+</sup>  $m/z$  = 1300.4, [M+3H]<sup>3+</sup>  $m/z$  = 1733.4.

**L-Src(145-187)<sup>TMR</sup> (L-3b).** By the identical procedure described for the synthesis of peptide **L-3a**, thioester **L-3b** was synthesized (3.5 mg, 2.7% yield) from H-Rink Amide-ChemMatrix resin (40 mg, 0.016-0.024 mmol). TMR (43 mg, 0.1 mmol) was coupled by using *N,N'*-diisopropylcarbodiimide (DIC) (15.5 mL, 0.1 mmol)/HOBt-H<sub>2</sub>O (15.3 mg, 0.1 mmol) in DMF for 4 h. MS(ESI): Calcd for  $C_{259}H_{382}N_{67}O_{76}S$ : 5682.36 (MH<sup>+</sup>); observed: [M+7H]<sup>7+</sup>  $m/z$  = 812.7 [M+6H]<sup>6+</sup>  $m/z$  = 948.0, [M+5H]<sup>5+</sup>  $m/z$  = 1137.4, [M+4H]<sup>4+</sup>  $m/z$  = 1421.3.

**D-Src(145-187)<sup>TMR</sup> (D-3b).** By the identical procedure described for the synthesis of peptide **L-3b**, thioester **D-3b** was synthesized (3.8 mg, 2.9% yield) from H-Rink Amide-ChemMatrix resin (40 mg, 0.016-0.024 mmol). MS(ESI): Calcd for  $C_{259}H_{382}N_{67}O_{76}S$ : 5682.36 (MH<sup>+</sup>); observed: [M+7H]<sup>7+</sup>  $m/z$  = 812.6, [M+6H]<sup>6+</sup>  $m/z$  = 947.9, [M+5H]<sup>5+</sup>  $m/z$  = 1137.3, [M+4H]<sup>4+</sup>  $m/z$  = 1421.4.

**D-Src(188-251) (D-4).** By the standard protocol for peptide synthesis, peptide **D-4** was synthesized (5.5 mg, 1.6% yield) from H-Rink Amide-ChemMatrix resin (40 mg  $\times$  2 portions, 0.032-0.048 mmol). MS(ESI): Calcd for  $C_{318}H_{500}N_{91}O_{94}S_3$ : 7198.22 (MH<sup>+</sup>); observed: [M+8H]<sup>8+</sup>  $m/z$  = 900.7, [M+7H]<sup>7+</sup>  $m/z$  = 1029.1, [M+6H]<sup>6+</sup>  $m/z$  = 1200.1, [M+5H]<sup>5+</sup>  $m/z$  = 1440.2, [M+4H]<sup>4+</sup>  $m/z$  = 1799.7.

**D-Src(145-251) (D-5a).** By the identical procedure described for the synthesis of peptide **L-5a**, peptide **D-4a** was synthesized (1.1 mg, 18% yield). MS(ESI): Calcd for  $C_{541}H_{848}N_{155}O_{163}S_3$ : 12227.84 (MH<sup>+</sup>); observed: [M+15H]<sup>15+</sup>  $m/z$  = 813.9, [M+14H]<sup>14+</sup>  $m/z$  = 874.5, [M+13H]<sup>13+</sup>  $m/z$  = 941.6, [M+12H]<sup>12+</sup>  $m/z$  = 1020.0, [M+11H]<sup>11+</sup>  $m/z$  = 1112.8, [M+10H]<sup>10+</sup>  $m/z$  = 1223.9, [M+9H]<sup>9+</sup>  $m/z$  = 1359.8, [M+8H]<sup>8+</sup>  $m/z$  = 1529.5, [M+7H]<sup>7+</sup>  $m/z$  = 1747.5.

**L-Src(145-251)<sup>TMR</sup> (L-5b).** By the identical procedure described for the synthesis of peptide **L-5a**, peptide **L-4b** was synthesized (0.45 mg, 13% yield). MS(ESI): Calcd for  $C_{569}H_{873}N_{158}O_{168}S_3$ : 12711.36 (MH<sup>+</sup>); observed: [M+15H]<sup>15+</sup>  $m/z$  = 848.5, [M+14H]<sup>14+</sup>  $m/z$  = 909.1, [M+13H]<sup>13+</sup>  $m/z$  = 978.9, [M+12H]<sup>12+</sup>  $m/z$  = 1060.5, [M+11H]<sup>11+</sup>  $m/z$  = 1156.7, [M+10H]<sup>10+</sup>  $m/z$  = 1272.3, [M+9H]<sup>9+</sup>  $m/z$  = 1413.3, [M+8H]<sup>8+</sup>  $m/z$  = 1590.2, [M+7H]<sup>7+</sup>  $m/z$  = 1760.0.

**D-Src(145-251)<sup>TMR</sup> (D-5b).** By the identical procedure described for the synthesis of peptide **L-5a**, peptide **D-5b** was synthesized (0.25 mg, 14% yield). MS(ESI): Calcd for  $C_{569}H_{873}N_{158}O_{168}S_3$ : 12711.36 (MH<sup>+</sup>); observed: [M+15H]<sup>15+</sup>  $m/z$  = 848.6, [M+14H]<sup>14+</sup>  $m/z$  = 909.0, [M+13H]<sup>13+</sup>  $m/z$  = 978.9, [M+12H]<sup>12+</sup>  $m/z$  = 1060.4, [M+11H]<sup>11+</sup>  $m/z$  = 1156.7, [M+10H]<sup>10+</sup>  $m/z$  = 1272.2, [M+9H]<sup>9+</sup>  $m/z$  = 1413.4, [M+8H]<sup>8+</sup>  $m/z$  = 1588.1.

**D-hmT pY324 (D-6):** By the identical procedure described for the synthesis of peptide **L-6**, peptide **D-6** was synthesized (14.5 mg, 30% yield). MS(ESI): Calcd for C<sub>66</sub>H<sub>99</sub>N<sub>13</sub>O<sub>23</sub>P: 1473.56 (MH<sup>+</sup>); observed: [M+H]<sup>+</sup> *m/z* = 1473.0.

**L-hmT pY324<sup>biotin</sup> (L-7, biotin-Acp-EPQpYEEIPIYL-NH<sub>2</sub>):** By the identical procedure described for the synthesis of peptide **L-6**, peptide **L-7** was synthesized (38 mg, 35% yield). D-Biotin was coupled with HBTU (73.3 mg, 0.3 mmol), HOBt·H<sub>2</sub>O (45.9 mg, 0.3 mmol) and (iPr)<sub>2</sub>NEt (0.104 mL, 0.6 mmol) in DMF. MS(ESI): Calcd for C<sub>82</sub>H<sub>124</sub>N<sub>16</sub>O<sub>26</sub>PS: 1813.01 (MH<sup>+</sup>); observed: [M+H]<sup>+</sup> *m/z* = 1812.7.

**D-hmT pY324<sup>biotin</sup> (D-7):** By the identical procedure described for the synthesis of peptide **L-7**, peptide **D-7** was synthesized using D-biotin (24.2 mg, 44% yield). MS(ESI): Calcd for C<sub>82</sub>H<sub>124</sub>N<sub>16</sub>O<sub>26</sub>PS: 1813.01 (MH<sup>+</sup>); observed: [M+H]<sup>+</sup> *m/z* = 1813.0.

**L-FMT1<sup>FAM</sup> (L-8, 5-FAM-GpYEEIA-NH<sub>2</sub>):** By the identical procedure described for the synthesis of peptide **L-6**, peptide **L-8** was synthesized (7.9 mg, 23% yield). Labeling of 5-carboxyfluorecein (33.9 mg, 0.090 mmol) was carried out with DIC (0.0139 mL, 0.090 mmol) and HOBt·H<sub>2</sub>O (13.8 mg, 0.090 mmol) in DMF. MS(MALDI-TOF): Calcd for C<sub>51</sub>H<sub>57</sub>N<sub>7</sub>O<sub>20</sub>P: 1119.02 (MH<sup>+</sup>); observed: [M+H]<sup>+</sup> *m/z* = 1118.7, [M+Na]<sup>+</sup> *m/z* = 1141.7, [M+K]<sup>+</sup> *m/z* = 1156.6.

**D-FMT1<sup>FAM</sup> (D-8):** By the identical procedure described for the synthesis of peptide **L-8**, peptide **D-8** was synthesized (11.6 mg, 33% yield). MS(MALDI-TOF): Calcd for C<sub>51</sub>H<sub>57</sub>N<sub>7</sub>O<sub>20</sub>P: 1119.02 (MH<sup>+</sup>); observed: [M+H]<sup>+</sup> *m/z* = 1118.7, [M+Na]<sup>+</sup> *m/z* = 1141.7, [M+K]<sup>+</sup> *m/z* = 1156.7.

## Analytical HPLC trace and mass spectrometry data of synthetic proteins and peptides

### L-*Src*(145-187) (L-3a)

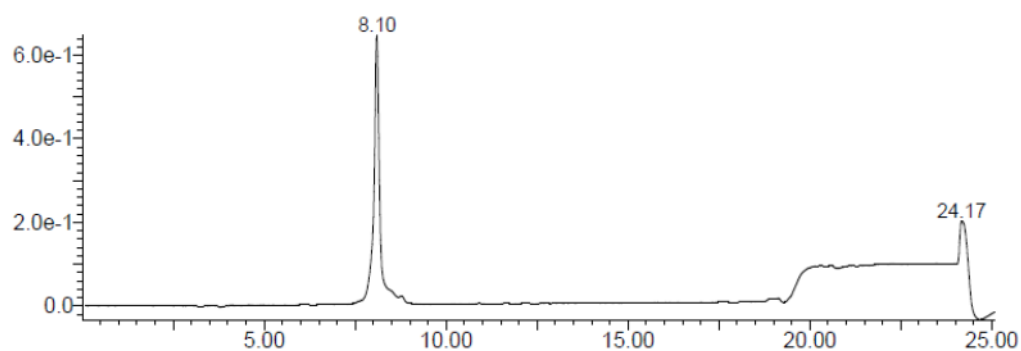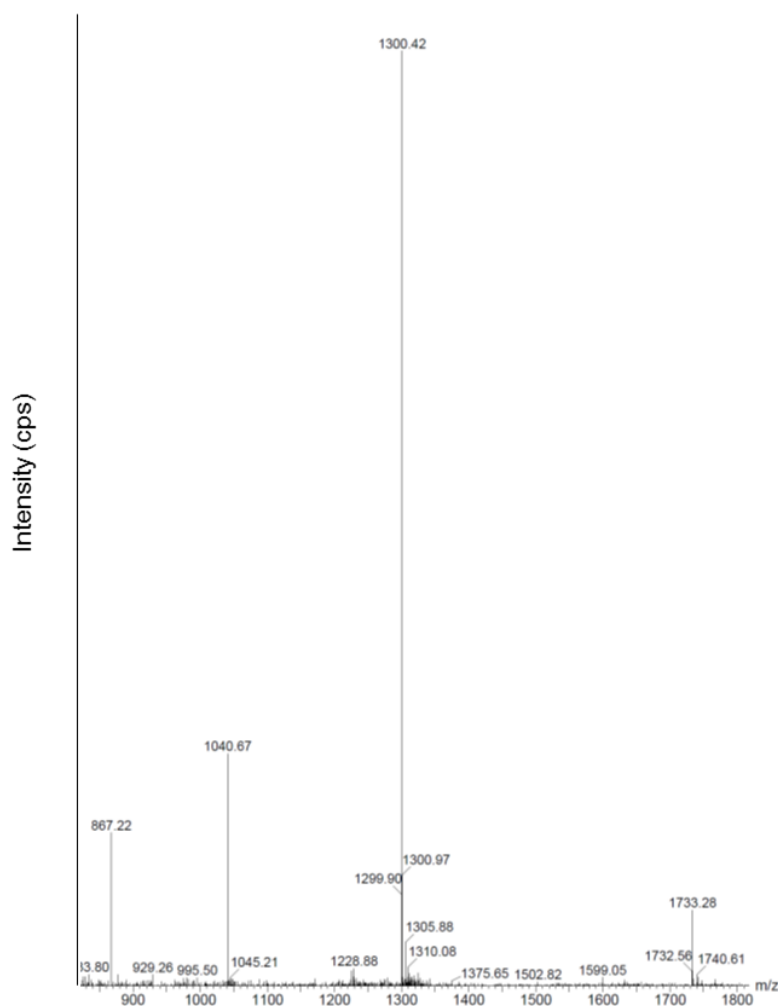

**Analytical HPLC trace of the purified product:** Cosmosil 5C18-AR300 column (Nacalai Tesque, 4.6 × 250 mm), linear gradient of 30-45% CH<sub>3</sub>CN containing 0.1% TFA at a flow rate of 1 mL min<sup>-1</sup> over 15 min.

**Mass spec analysis of the purified product:** Expected mass based on sequence: 5198.83 (MH<sup>+</sup>); Major observed ions: 867.2 (+6), 1040.7 (+5), 1300.4 (+4), 1733.3 (+3).

**D-Src(145-187) (D-3a)**

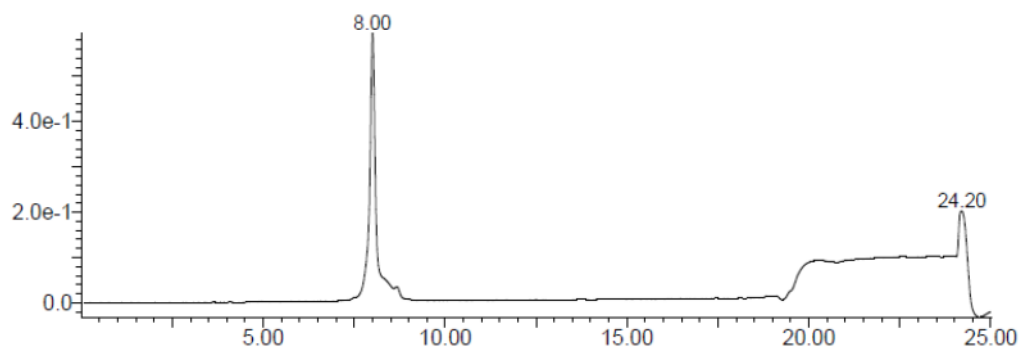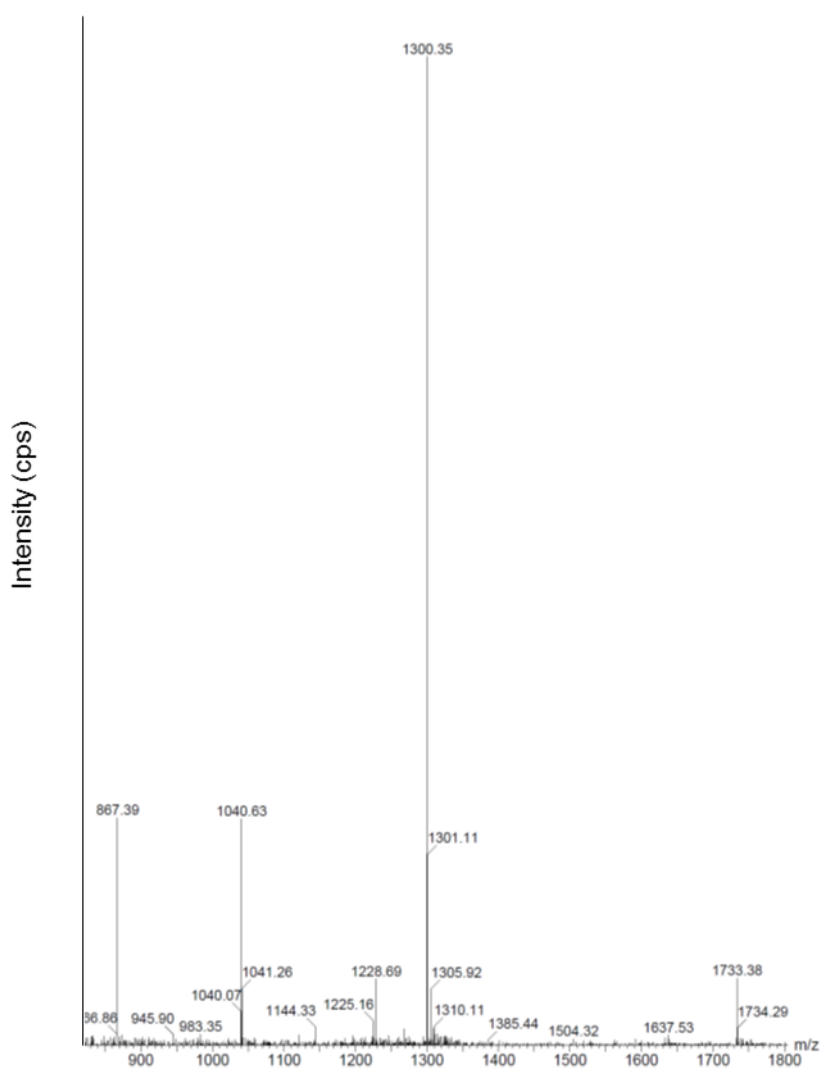

**Analytical HPLC trace of the purified product:** Cosmosil 5C18-AR300 column (Nacalai Tesque, 4.6 × 250 mm), linear gradient of 30-45% CH<sub>3</sub>CN containing 0.1% TFA at a flow rate of 1 mL min<sup>-1</sup> over 15 min.

**Mass spec analysis of the purified product:** Expected mass based on sequence: 5198.83 (MH<sup>+</sup>); Major observed ions: 867.4 (+6), 1040.7 (+5), 1300.4 (+4), 1733.4 (+3).

**L- $\text{Src}(145-187)^{\text{TMR}}$  (L-3b)**

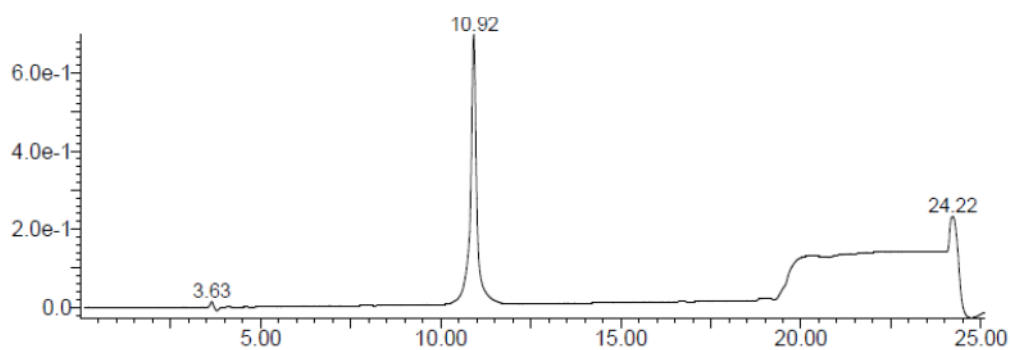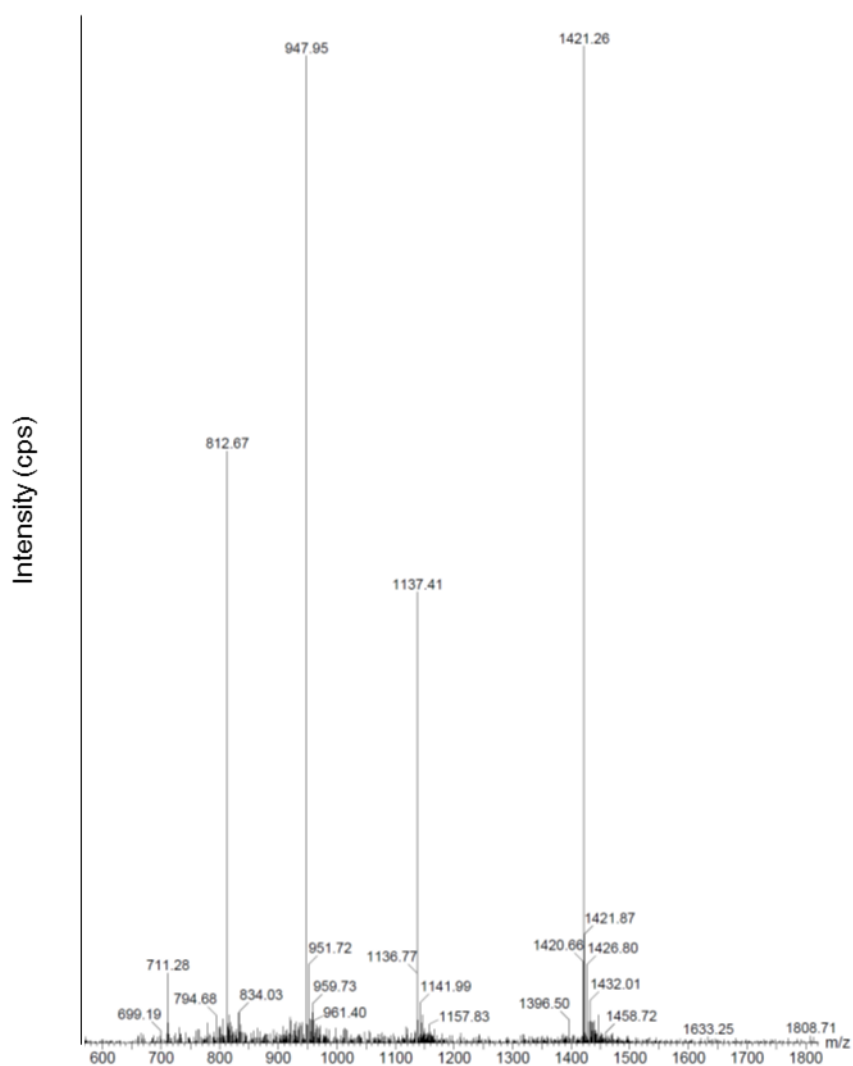

**Analytical HPLC trace of the purified product:** Cosmosil 5C18-AR300 column (Nacalai Tesque,  $4.6 \times 250$  mm), linear gradient of 30-45%  $\text{CH}_3\text{CN}$  containing 0.1% TFA at a flow rate of  $1 \text{ mL min}^{-1}$  over 15 min.

**Mass spec analysis of the purified product:** Expected mass based on sequence: 5682.36 ( $\text{MH}^+$ ); Major observed ions: 812.7 (+7), 948.0 (+6), 1137.4 (+5), 1421.3 (+4).

**D-Src(145-187)<sup>TMR</sup> (D-3b)**

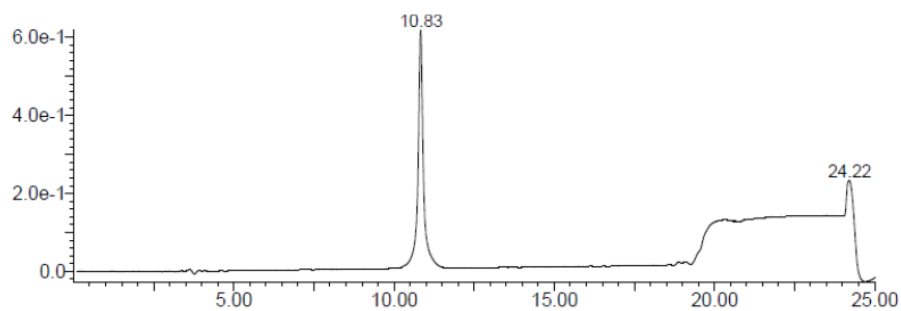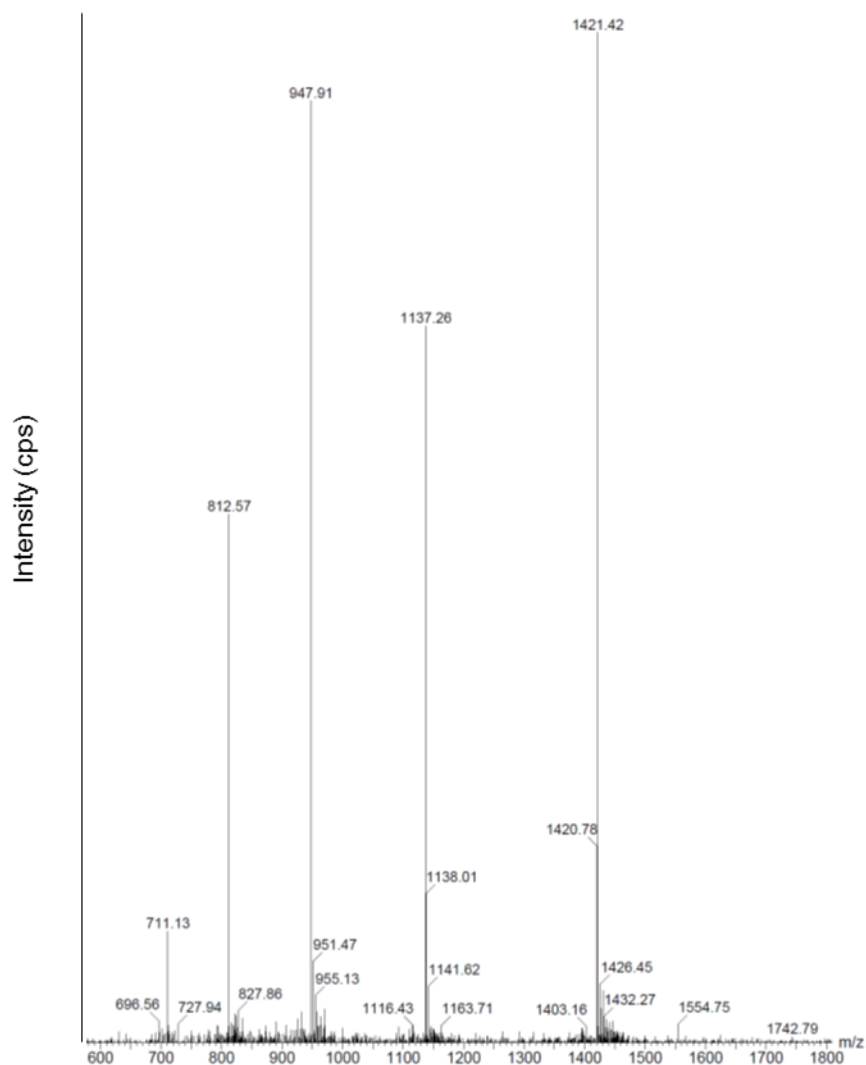

**Analytical HPLC trace of the purified product:** Cosmosil 5C18-AR300 column (Nacalai Tesque, 4.6 × 250 mm), linear gradient of 30-45% CH<sub>3</sub>CN containing 0.1% TFA at a flow rate of 1 mL min<sup>-1</sup> over 15 min.

**Mass spec analysis of the purified product:** Expected mass based on sequence: 5682.36 (MH<sup>+</sup>); Major observed ions: 812.6 (+7), 947.9 (+6), 1137.3 (+5), 1421.4 (+4).

## L-**Src(188-251)** (L-4)

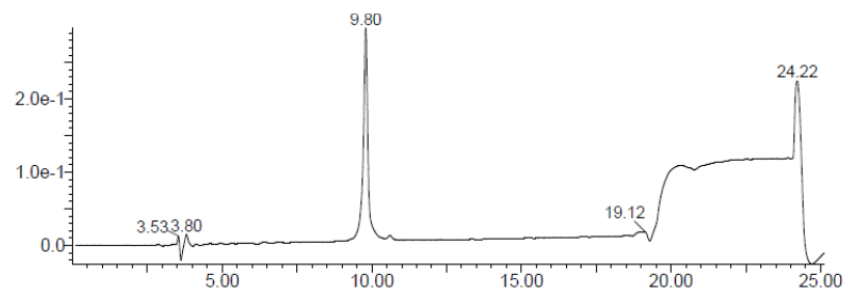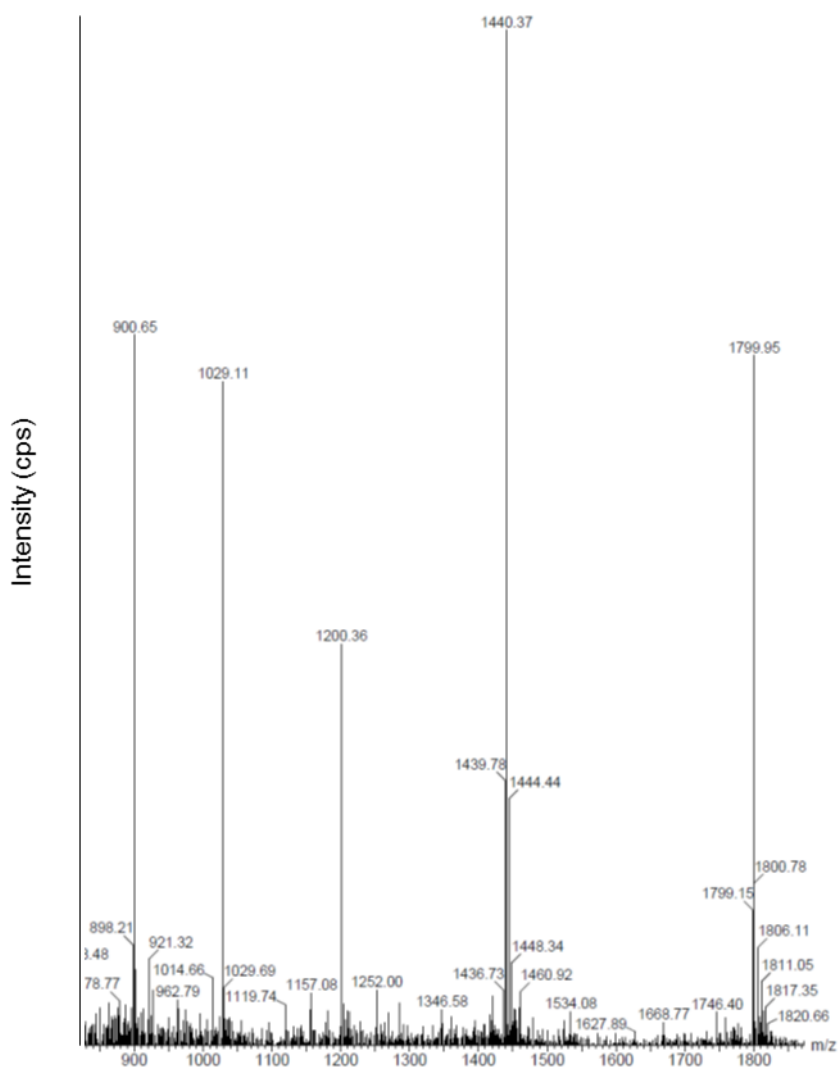

**Analytical HPLC trace of the purified product:** Cosmosil 5C18-AR300 column (Nacalai Tesque, 4.6 × 250 mm), linear gradient of 30-45% CH<sub>3</sub>CN containing 0.1% TFA at a flow rate of 1 mL min<sup>-1</sup> over 15 min.

**Mass spec analysis of the purified product:** Expected mass based on sequence: 7198.22 (MH<sup>+</sup>); Major observed ions: 900.7 (+8), 1029.1 (+7), 1200.4 (+6), 1440.4 (+5), 1800.0 (+4).



## D-Src(188-251) (D-4)

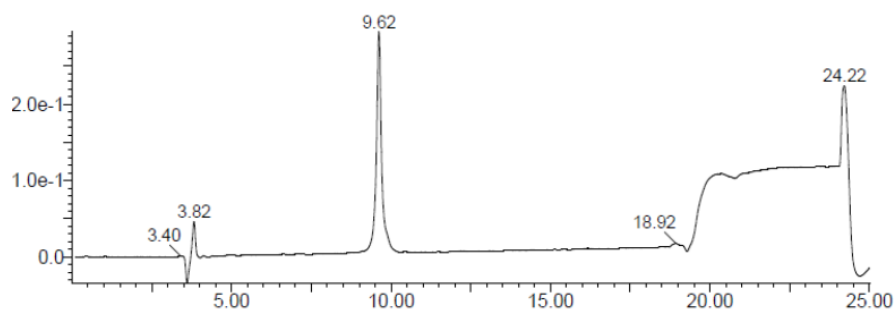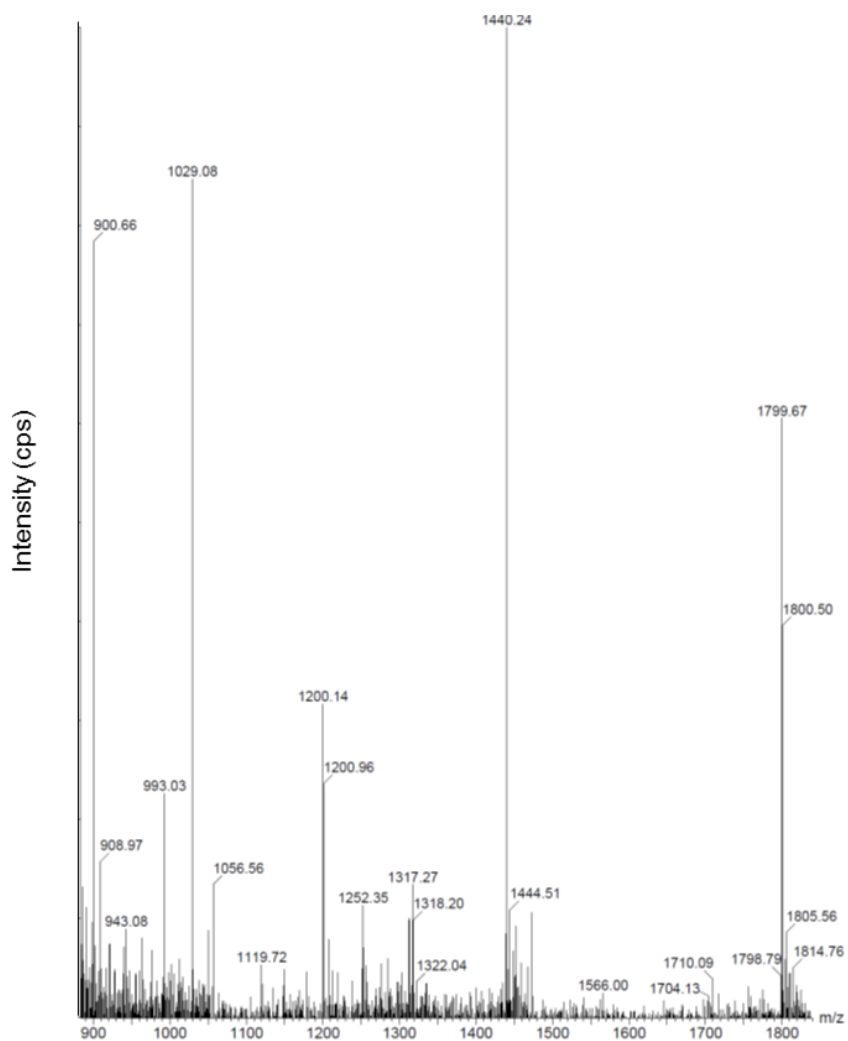

**Analytical HPLC trace of the purified product:** Cosmosil 5C18-AR300 column (Nacalai Tesque,  $4.6 \times 250$  mm), linear gradient of 30-45%  $\text{CH}_3\text{CN}$  containing 0.1% TFA at a flow rate of  $1 \text{ mL min}^{-1}$  over 15 min.

**Mass spec analysis of the purified product:** Expected mass based on sequence: 7198.22 ( $\text{MH}^+$ ); Major observed ions: 900.7 (+8), 1029.1 (+7), 1200.1 (+6), 1440.2 (+5), 1799.7 (+4).

## L-**Src**(145-251) (L-5a)

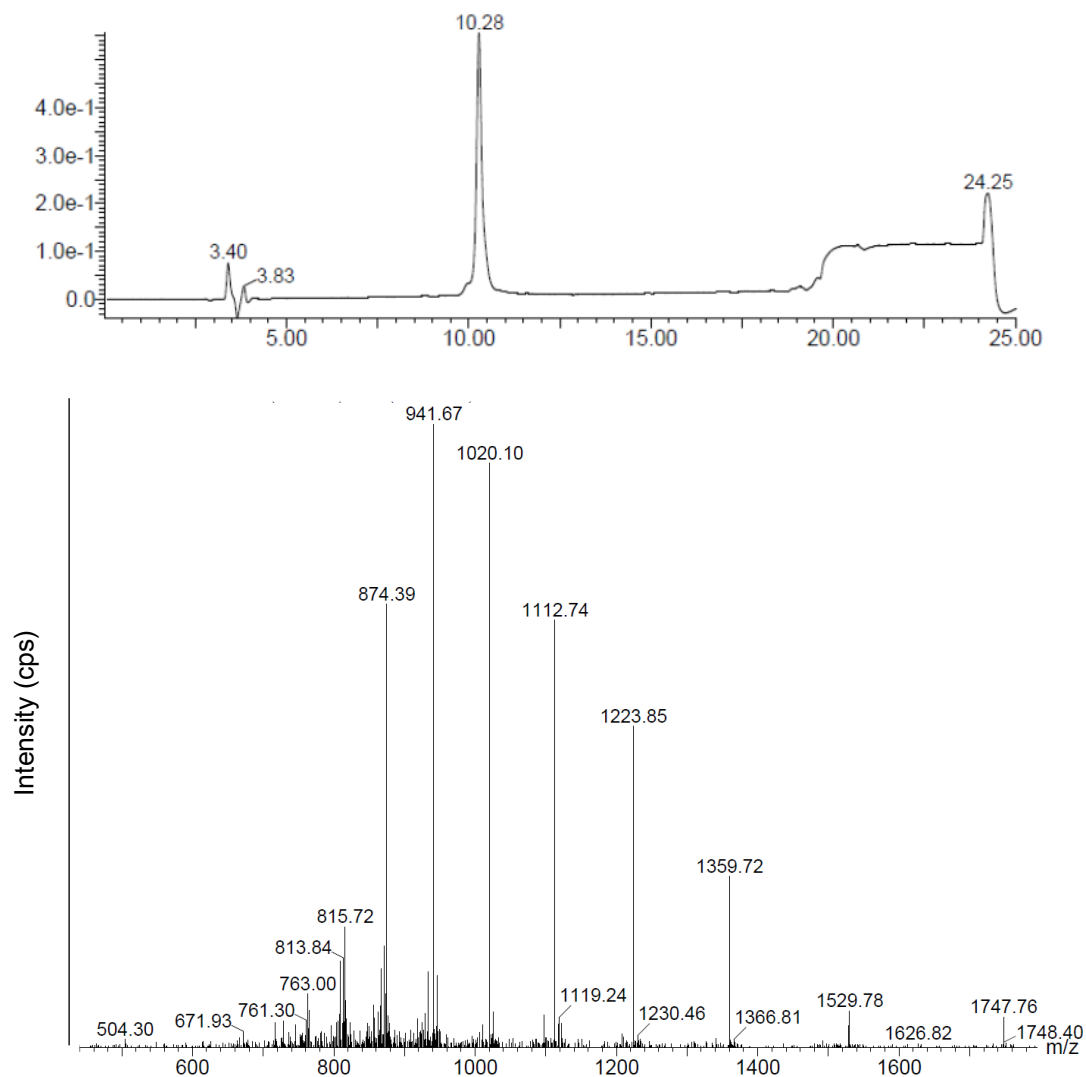

**Analytical HPLC trace of the purified product:** Cosmosil 5C18-AR300 column (Nacalai Tesque, 4.6 × 250 mm), linear gradient of 30-45% CH<sub>3</sub>CN containing 0.1% TFA at a flow rate of 1 mL min<sup>-1</sup> over 15 min.

**Mass spec analysis of the purified product:** Expected mass based on sequence: 12227.84 (MH<sup>+</sup>); Major observed ions: 813.9 (+15), 874.4 (+14), 941.7 (+13), 1020.1 (+12), 1112.7 (+11), 1223.9 (+10), 1359.7 (+9), 1529.8 (+8), 1747.8 (+7).

**D-Src(145-251) (D-5a)**

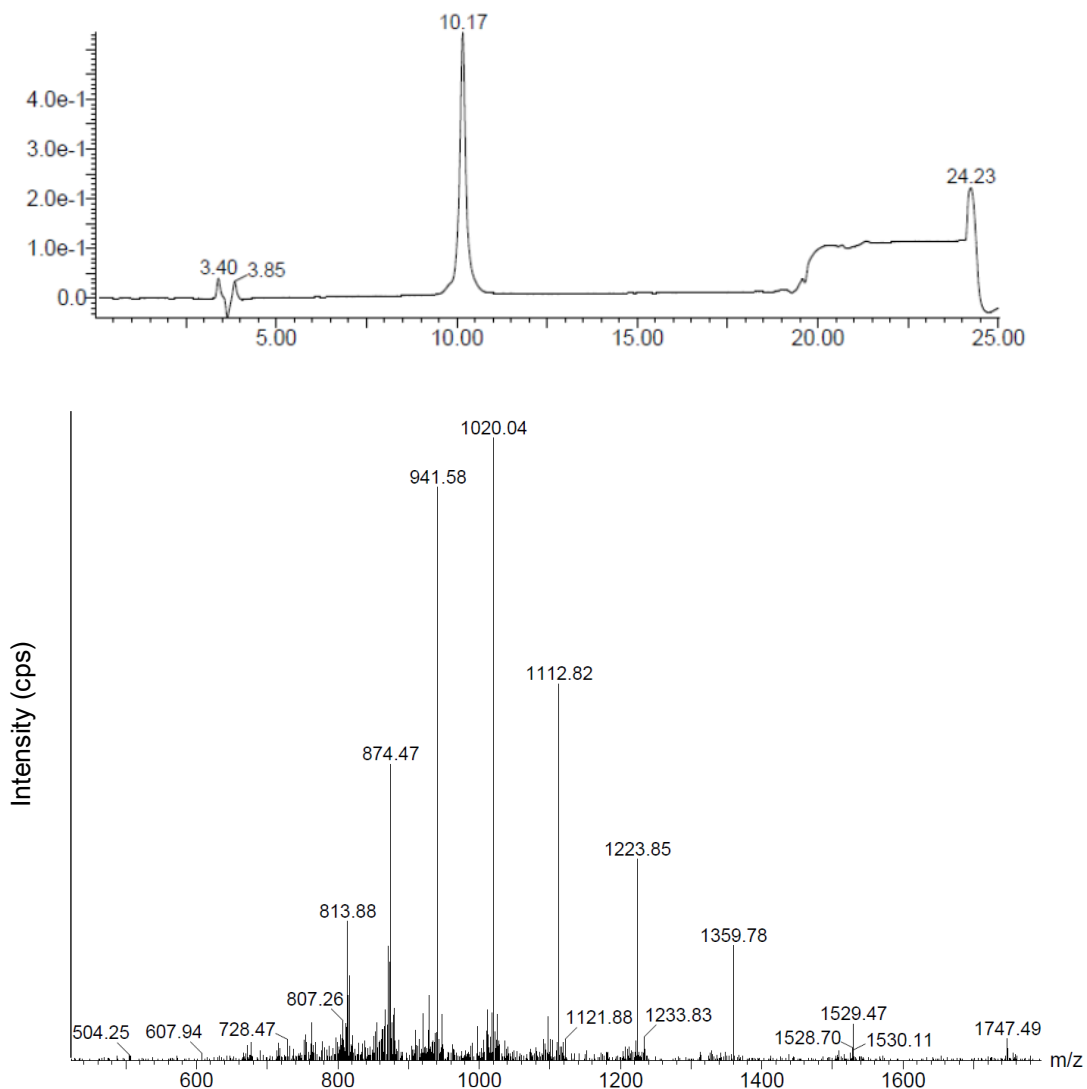

**Analytical HPLC trace of the purified product:** Cosmosil 5C18-AR300 column (Nacalai Tesque, 4.6 × 250 mm), linear gradient of 30-45% CH<sub>3</sub>CN containing 0.1% TFA at a flow rate of 1 mL min<sup>-1</sup> over 15 min.

**Mass spec analysis of the purified product:** Expected mass based on sequence: 12227.84 (MH<sup>+</sup>); Major observed ions: 813.9 (+15), 874.5 (+14), 941.6 (+13), 1020.0 (+12), 1112.8 (+11), 1223.9 (+10), 1359.8 (+9), 1529.5 (+8), 1747.5 (+7).

Analytical HPLC trace and ESI-MS of synthetic Src SH2 domain proteins. (A) Analytical HPLC of L-Src(145-187) (**L-5a**, red), synthetic D-Src(145-187) (**D-5a**, blue), and a mixture of **L-5a** and **D-5a** (1:1) (purple) with detection at UV 220 nm. (B and C) ESI-MS analysis of L-Src(145-187) (**L-5a**) and D-Src(145-187) (**D-5a**), respectively.

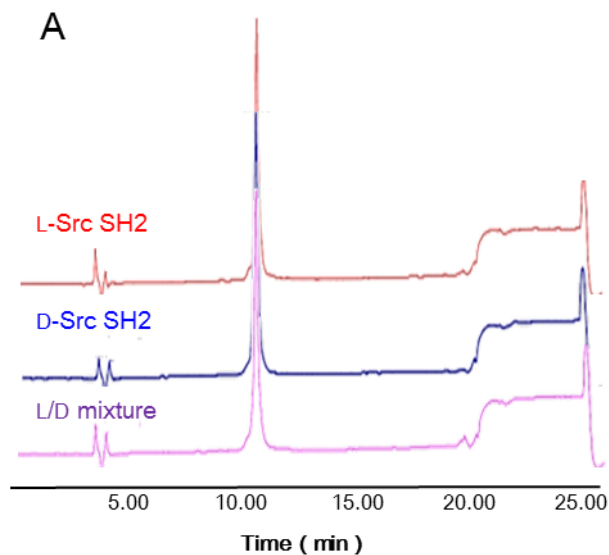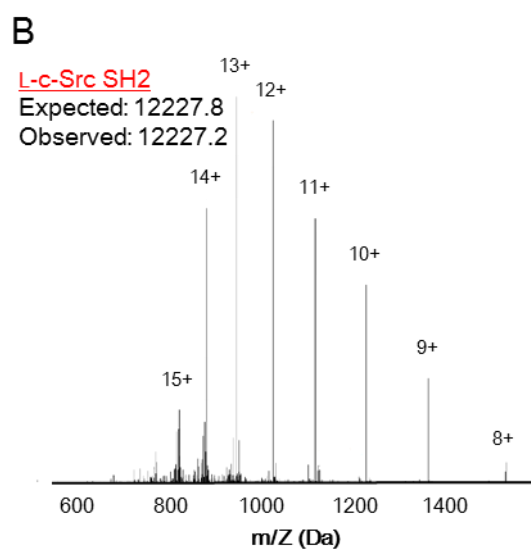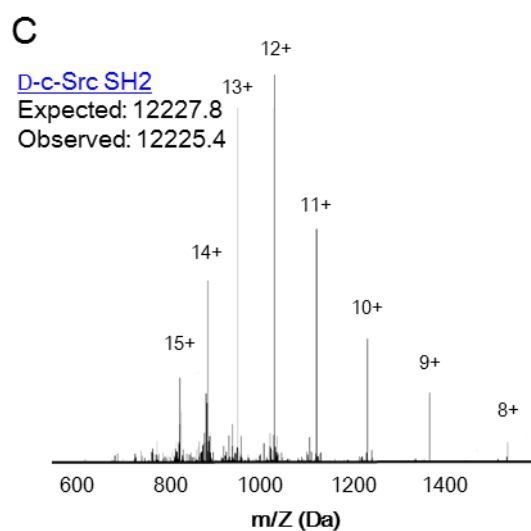

## L-Src(145-251)<sup>TMR</sup> (L-5b)

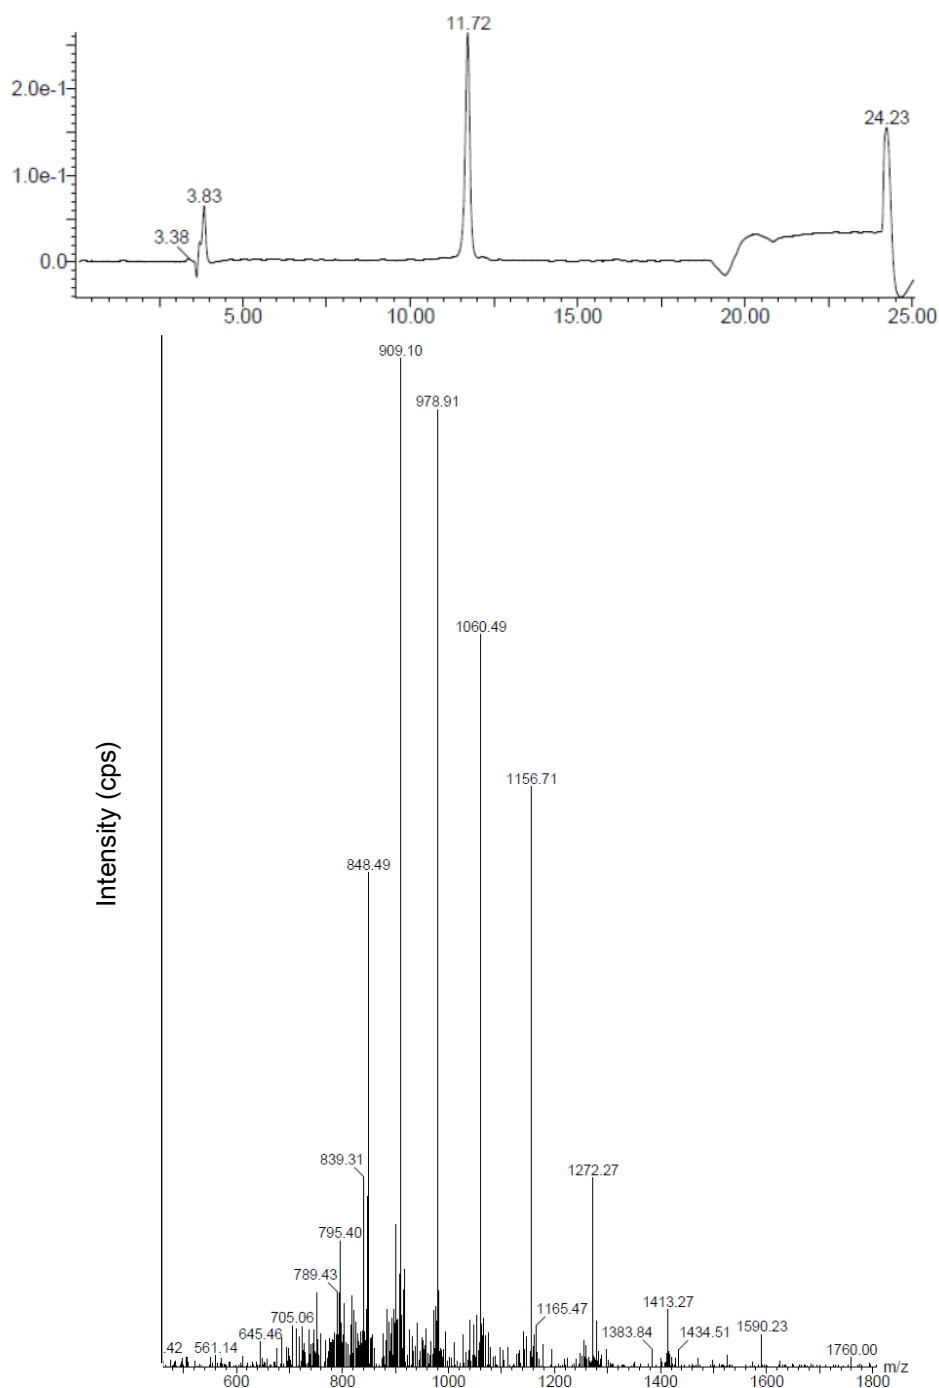

**Analytical HPLC trace of the purified product:** Cosmosil 5C18-AR300 column (Nacalai Tesque, 4.6 × 250 mm), linear gradient of 30-45% CH<sub>3</sub>CN containing 0.1% TFA at a flow rate of 1 mL min<sup>-1</sup> over 15 min.

**Mass spec analysis of the purified product:** Expected mass based on sequence: 12711.36 (MH<sup>+</sup>); Major observed ions: 848.5 (+15), 909.1 (+14), 978.9 (+13), 1060.5 (+12), 1156.7 (+11), 1272.3 (+10), 1413.3 (+9), 1590.2 (+8), 1760.0 (+7).

**D-Src(145-251)<sup>TMR</sup> (D-5b)**

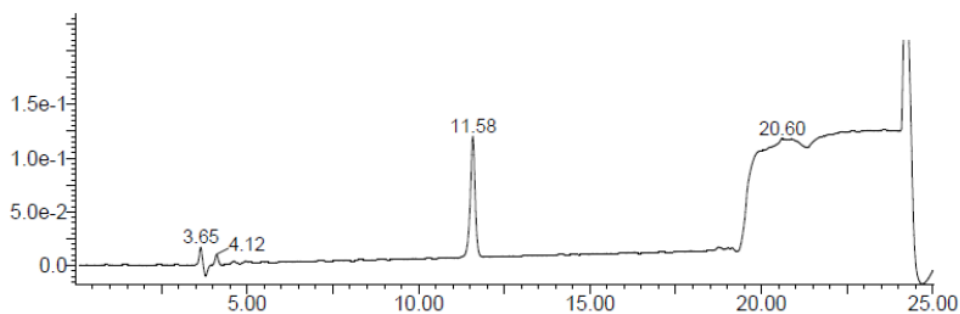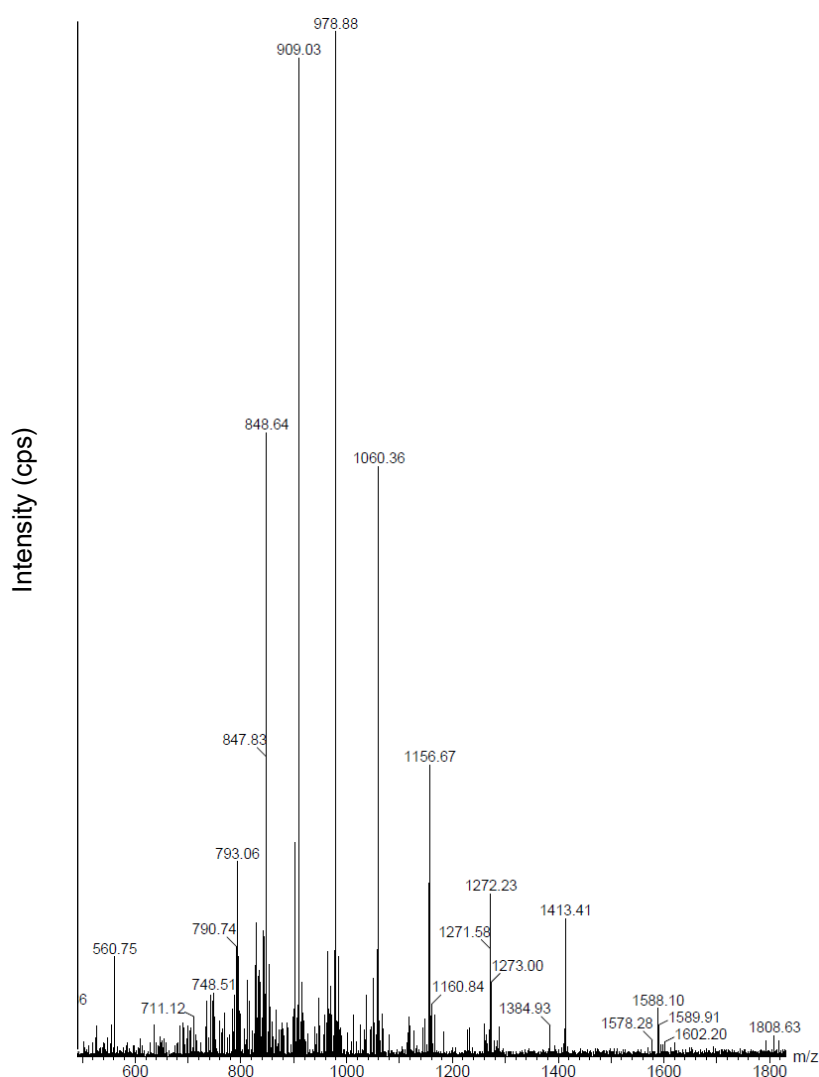

**Analytical HPLC trace of the purified product:** Cosmosil 5C18-AR300 column (Nacalai Tesque, 4.6 × 250 mm), linear gradient of 30-45% CH<sub>3</sub>CN containing 0.1% TFA at a flow rate of 1 mL min<sup>-1</sup> over 15 min.

**Mass spec analysis of the purified product:** Expected mass based on sequence: 12711.36 (MH<sup>+</sup>); Major observed ions: 848.6 (+15), 909.0 (+14), 978.9 (+13), 1060.4 (+12), 1156.7 (+11), 1272.2 (+10), 1413.4 (+9), 1588.1 (+8).

## L-hmT pY324 (L-6)

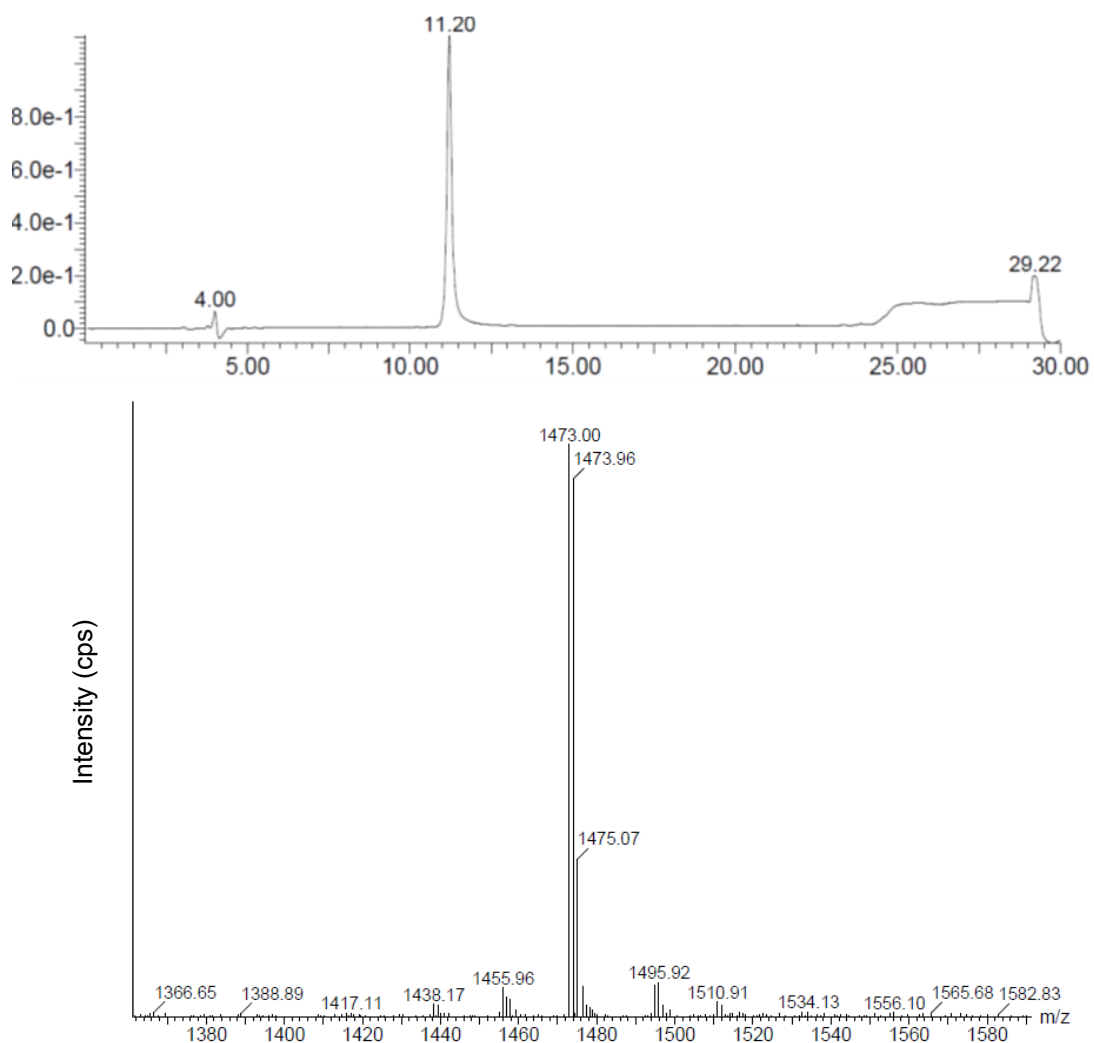

**Analytical HPLC trace of the purified product:** Cosmosil 5C18-AR300 preparative column (Nacalai Tesque, 4.6 × 250 mm), linear gradient of 20-40% CH<sub>3</sub>CN containing 0.1% TFA at a flow rate of 1 mL min<sup>-1</sup> over 20 min.

**Mass spec analysis of the purified product:** Expected mass based on sequence: 1473.56 (MH<sup>+</sup>); Major observed ions: 1473.0 (+H).

## D-hmT pY324 (D-6)

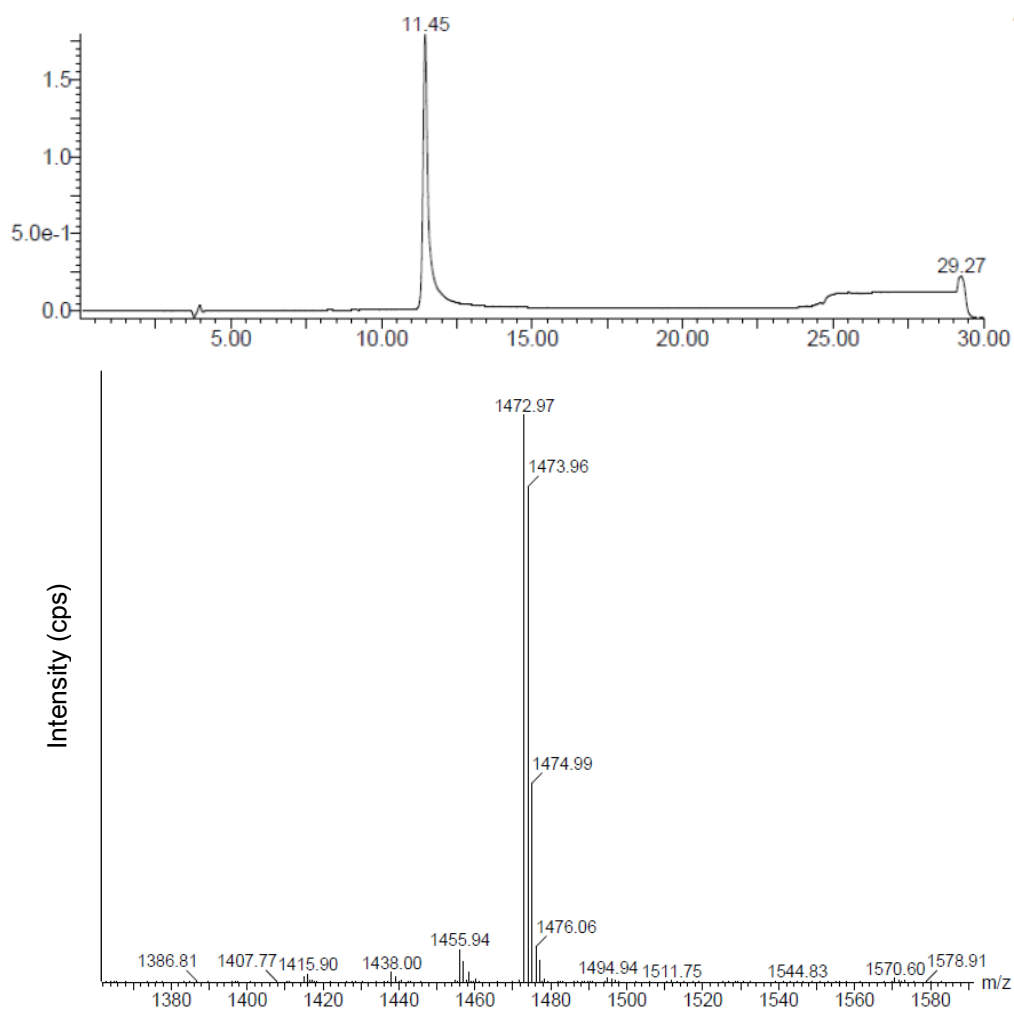

**Analytical HPLC trace of the purified product:** Cosmosil 5C18-AR300 column (Nacalai Tesque,  $4.6 \times 250$  mm), linear gradient of 20-40%  $\text{CH}_3\text{CN}$  containing 0.1% TFA at a flow rate of  $1 \text{ mL min}^{-1}$  over 20 min.

**Mass spec analysis of the purified product:** Expected mass based on sequence: 1473.56 ( $\text{MH}^+$ ); Major observed ions: 1473.0 (+H).



## L-hmT pY324<sup>biotin</sup> (L-7)

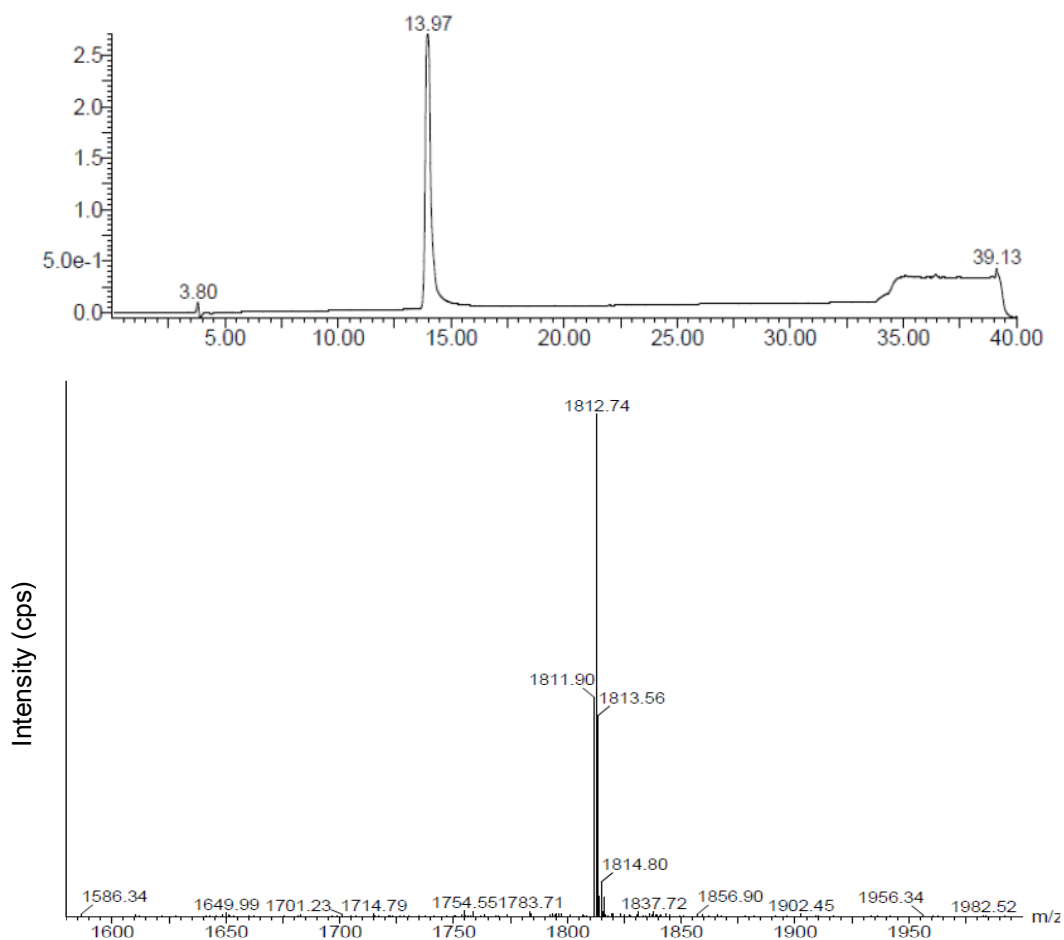

**Analytical HPLC trace of the purified product:** Cosmosil 5C18-AR300 column (Nacalai Tesque,  $4.6 \times 250$  mm), linear gradient of 20-50%  $\text{CH}_3\text{CN}$  containing 0.1% TFA at a flow rate of  $1 \text{ mL min}^{-1}$  over 30 min.

**Mass spec analysis of the purified product:** Expected mass based on sequence: 1813.01 ( $\text{MH}^+$ ); Major observed ions: 1812.7 (+H).

**D-hmT pY324<sup>biotin</sup> (D-7)**

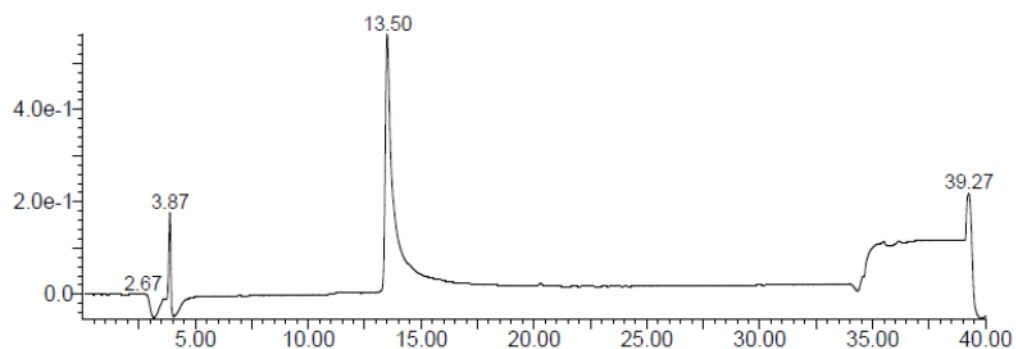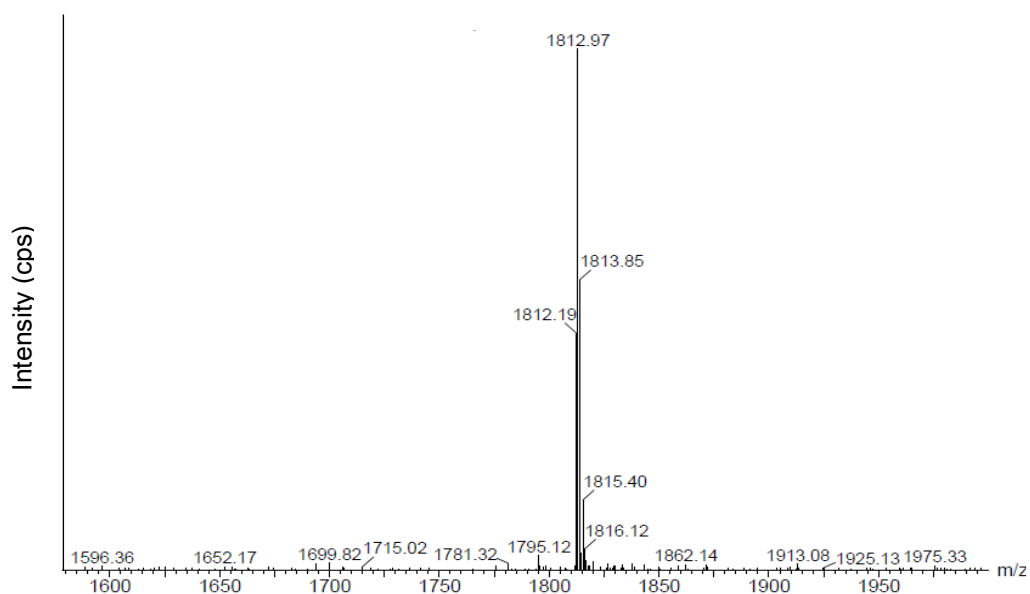

**Analytical HPLC trace of the purified product:** Cosmosil 5C18-AR300 column (Nacalai Tesque, 4.6 × 250 mm), linear gradient of 20-50% CH<sub>3</sub>CN containing 0.1% TFA at a flow rate of 1 mL min<sup>-1</sup> over 30 min.

**Mass spec analysis of the purified product:** Expected mass based on sequence: 1813.01 (MH<sup>+</sup>); Major observed ions: 1813.0 (+H).

## L-FMT1<sup>FAM</sup> (L-8)

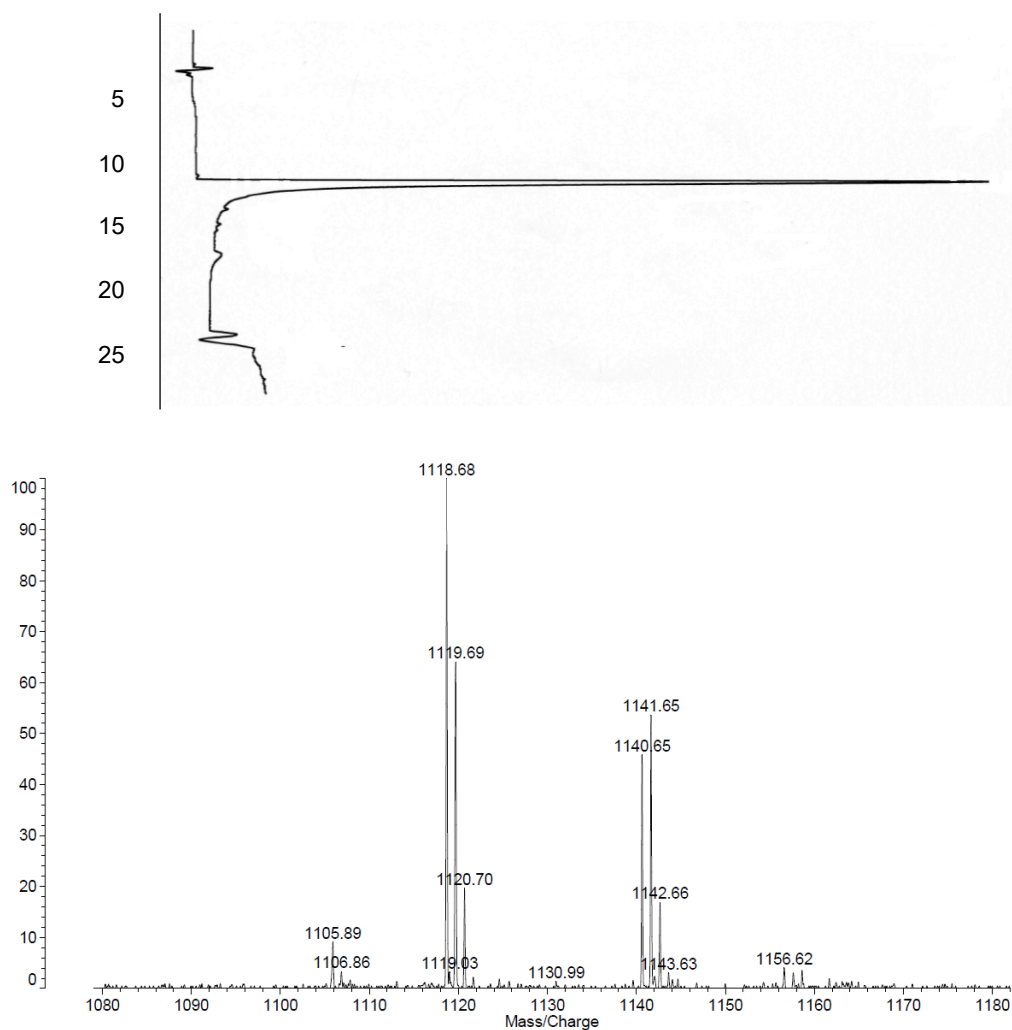

**Analytical HPLC trace of the purified product:** Cosmosil 5C18-ARII column (Nacalai Tesque, 4.6 × 250 mm), linear gradient of 20-40% CH<sub>3</sub>CN containing 0.1% TFA at a flow rate of 1 mL min<sup>-1</sup> over 20 min.

**Mass spec analysis of the purified product:** Expected mass based on sequence: 1119.02 (MH<sup>+</sup>); Major observed ions: 1118.7 (+H), 1141.7 (+Na), 1156.6 (+K).

## D-FMT1<sup>FAM</sup> (D-8)

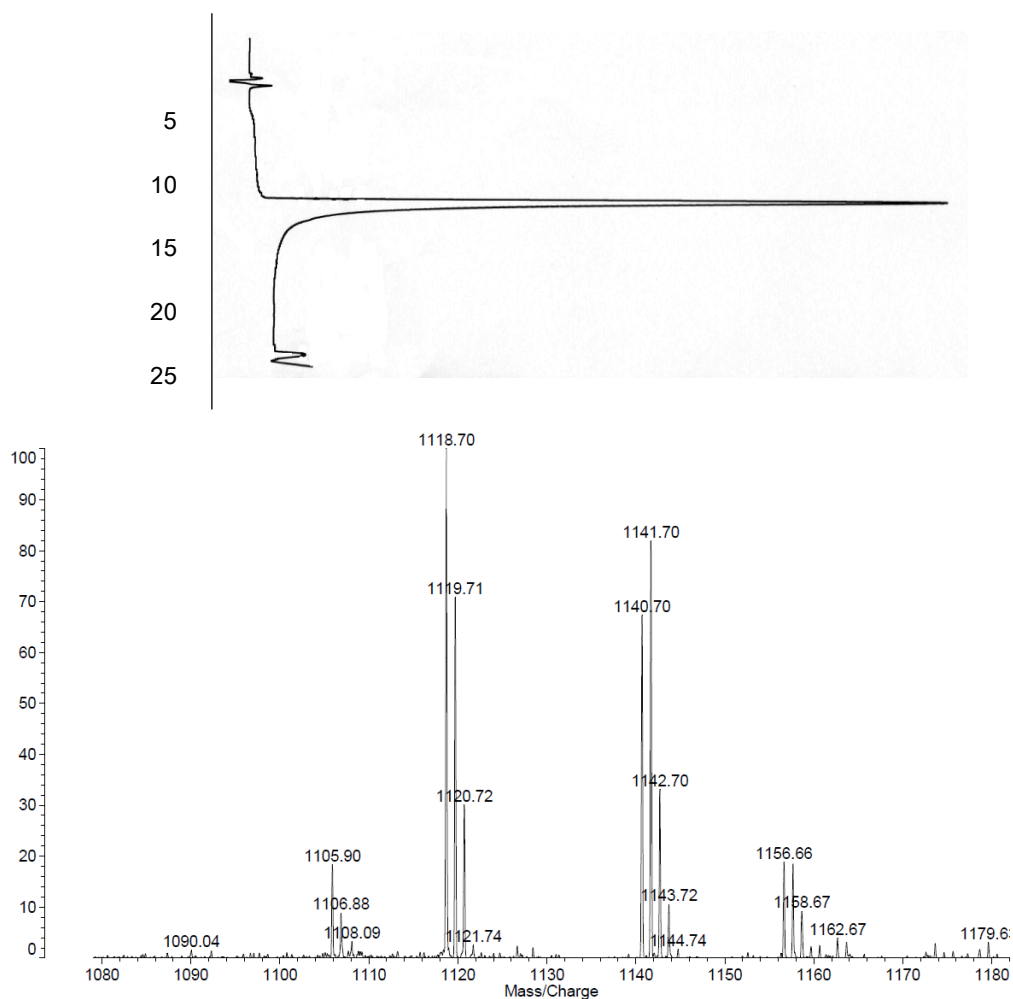

**Analytical HPLC trace of the purified product:** Cosmosil 5C18-ARII column (Nacalai Tesque, 4.6 × 250 mm), linear gradient of 20-40% CH<sub>3</sub>CN containing 0.1% TFA at a flow rate of 1 mL min<sup>-1</sup> over 20 min.

**Mass spec analysis of the purified product:** Expected mass based on sequence: 1119.02 (MH<sup>+</sup>); Major observed ions: 1118.7 (+H), 1141.7 (+Na), 1156.7 (+K).
